# Supplementary material for: Galvanic Replacement Preparation of Spindle-Structured Sb@C@NC as Anode for Superior Lithium-Ion Storage
Source: MDPI journal article supplement (doi:10.3390/batteries8110245), 2022-11-18
Supplement: s1 [file s1]

Archive with 1 entries (1 files):
- batteries-1969818-supplementary.pdf
